# Supplementary material for: Identification of a Novel Heart–Liver Axis: Matrix Metalloproteinase‐2 Negatively Regulates Cardiac Secreted Phospholipase A2 to Modulate Lipid Metabolism and Inflammation in the Liver
Source: PubMed Central journal article supplement — J Am Heart Assoc. 2015 Nov 13;4(11):e002553. doi: 10.1161/JAHA.115.002553 (PMC4845223; doi:10.1161/jaha.115.002553), 2015-11-13
Supplement: JAH3-4-e002553-s001.pdf [file JAH3-4-e002553-s001.pdf]

## SUPPLEMENTAL MATERIAL

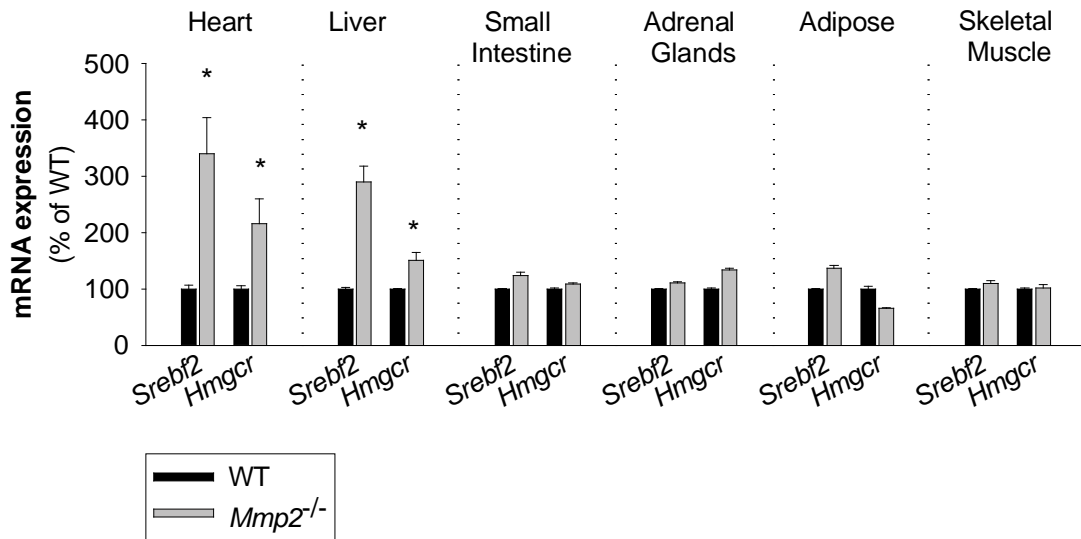

### Supplemental Figure S1.

qRT-PCR analysis of *Srebf2* and *Hmgcr* in various tissues from WT and *Mmp2*<sup>-/-</sup> mice.  $n=4$  per genotype. \*:  $P < 0.05$  vs. WT.

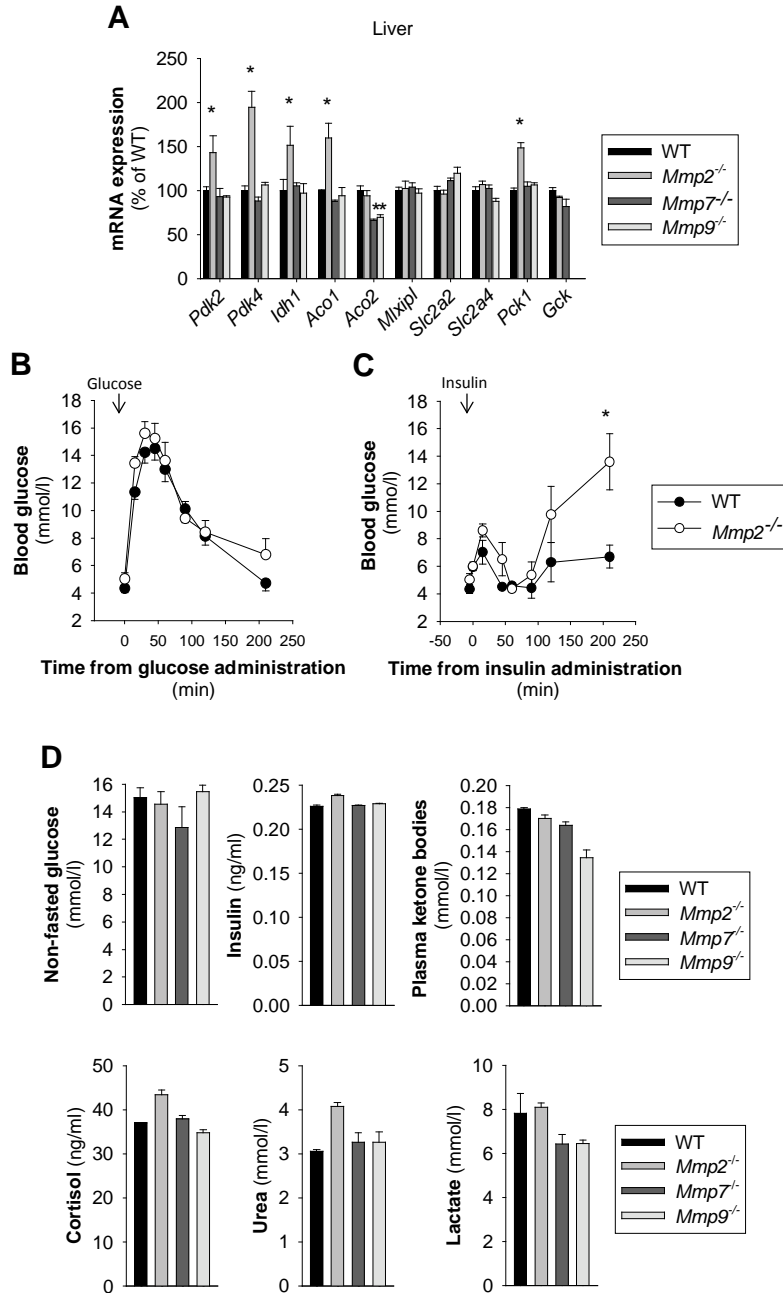

**Supplemental Figure S2.**

- (A) Quantitative analysis of mRNA levels for genes involved in glucose metabolism (related to regular Figure 2A, C).  $n=4$  individual mice *per* genotype. \*:  $P < 0.05$  vs. WT.
- (B) Glucose tolerance test.  $n=4$  individual mice *per* genotype. No difference between genotypes.
- (C) Insulin tolerance test. \*:  $P < 0.05$  vs. WT.
- (D) Quantitative analysis of metabolites. Pools of  $n=4$  *per* genotype. No difference was observed between genotypes.

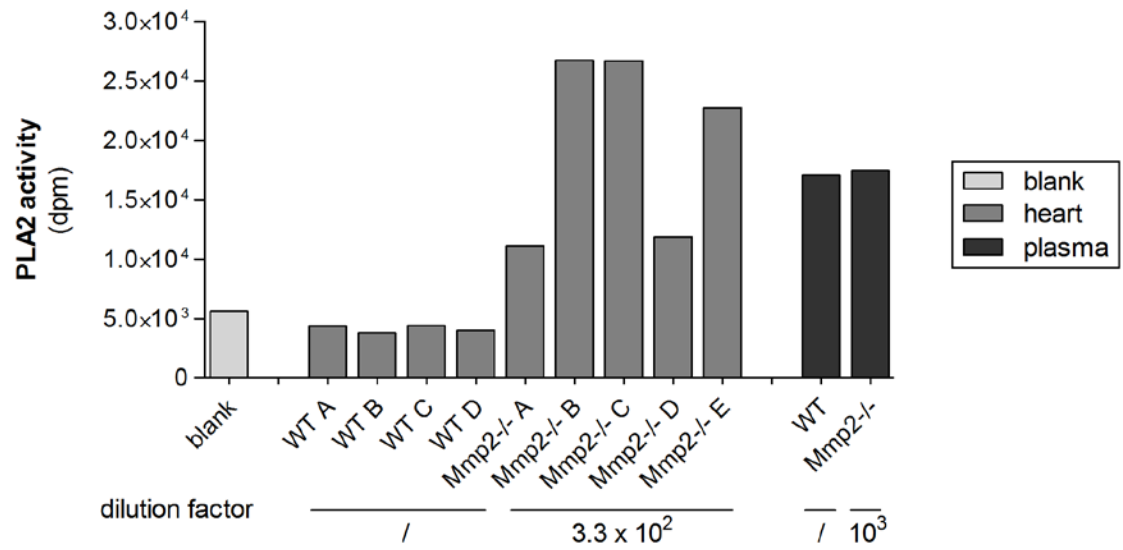

**Supplemental Figure S3.**

PLA<sub>2</sub> activity of individual WT and *Mmp2*<sup>-/-</sup> hearts and pooled plasma samples determined using the *in vitro* [<sup>3</sup>H]-oleic acid radiolabelled *E.coli* membrane assay. *n*=4 (WT) and *n*=5 (*Mmp2*<sup>-/-</sup>).

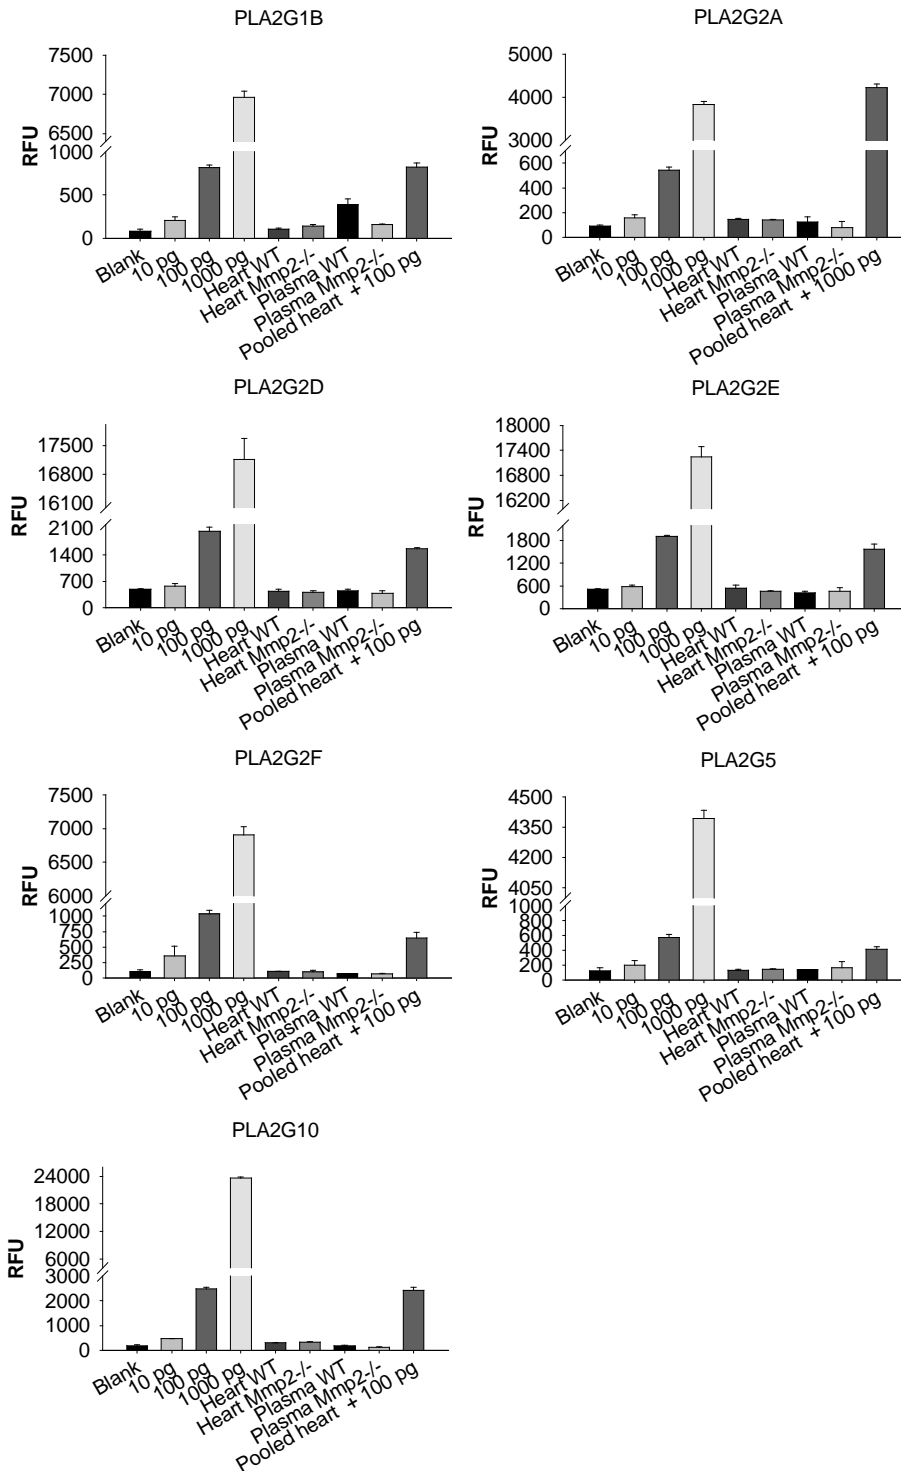

**Supplemental Figure S4. Time-resolved fluorescence immunoassay of mouse sPLA<sub>2</sub> isoforms.**

The analysis with highly specific antibodies against mouse sPLA<sub>2</sub> isoforms excludes PLA2G1B, PLA2G2A, PLA2G2D, PLA2G2E, PLA2G2F, PLA2G5 and PLA2G10 as major components of cardiac or plasma sPLA<sub>2</sub> in MMP-2-deficiency.

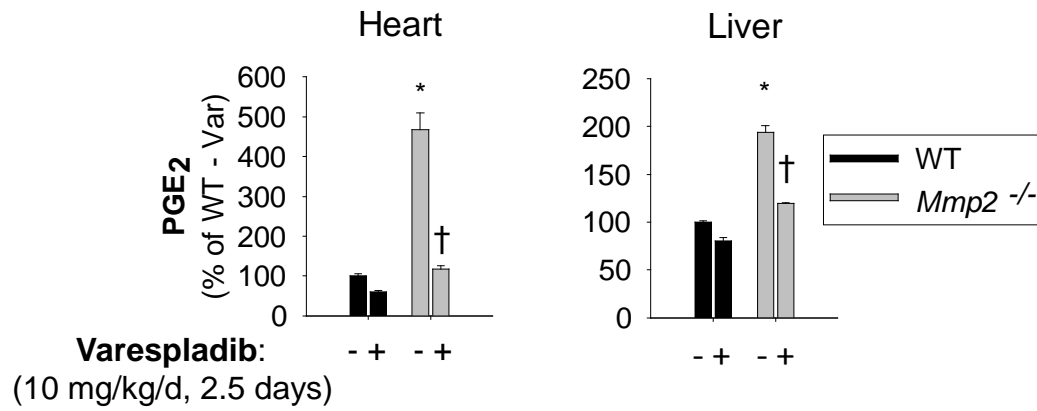

**Supplemental Figure S5.** The inhibition of systemic sPLA<sub>2</sub> by varespladib lowered cardiac as well as hepatic PGE<sub>2</sub> levels. Data are related to our earlier study<sup>1</sup>. The PGE<sub>2</sub> levels of pools of  $n=4$  mice *per* genotype were analyzed in duplicate. \*:  $P \leq 0.05$  vs. WT (-). †:  $P \leq 0.05$  vs. *Mmp2*<sup>-/-</sup> (-).

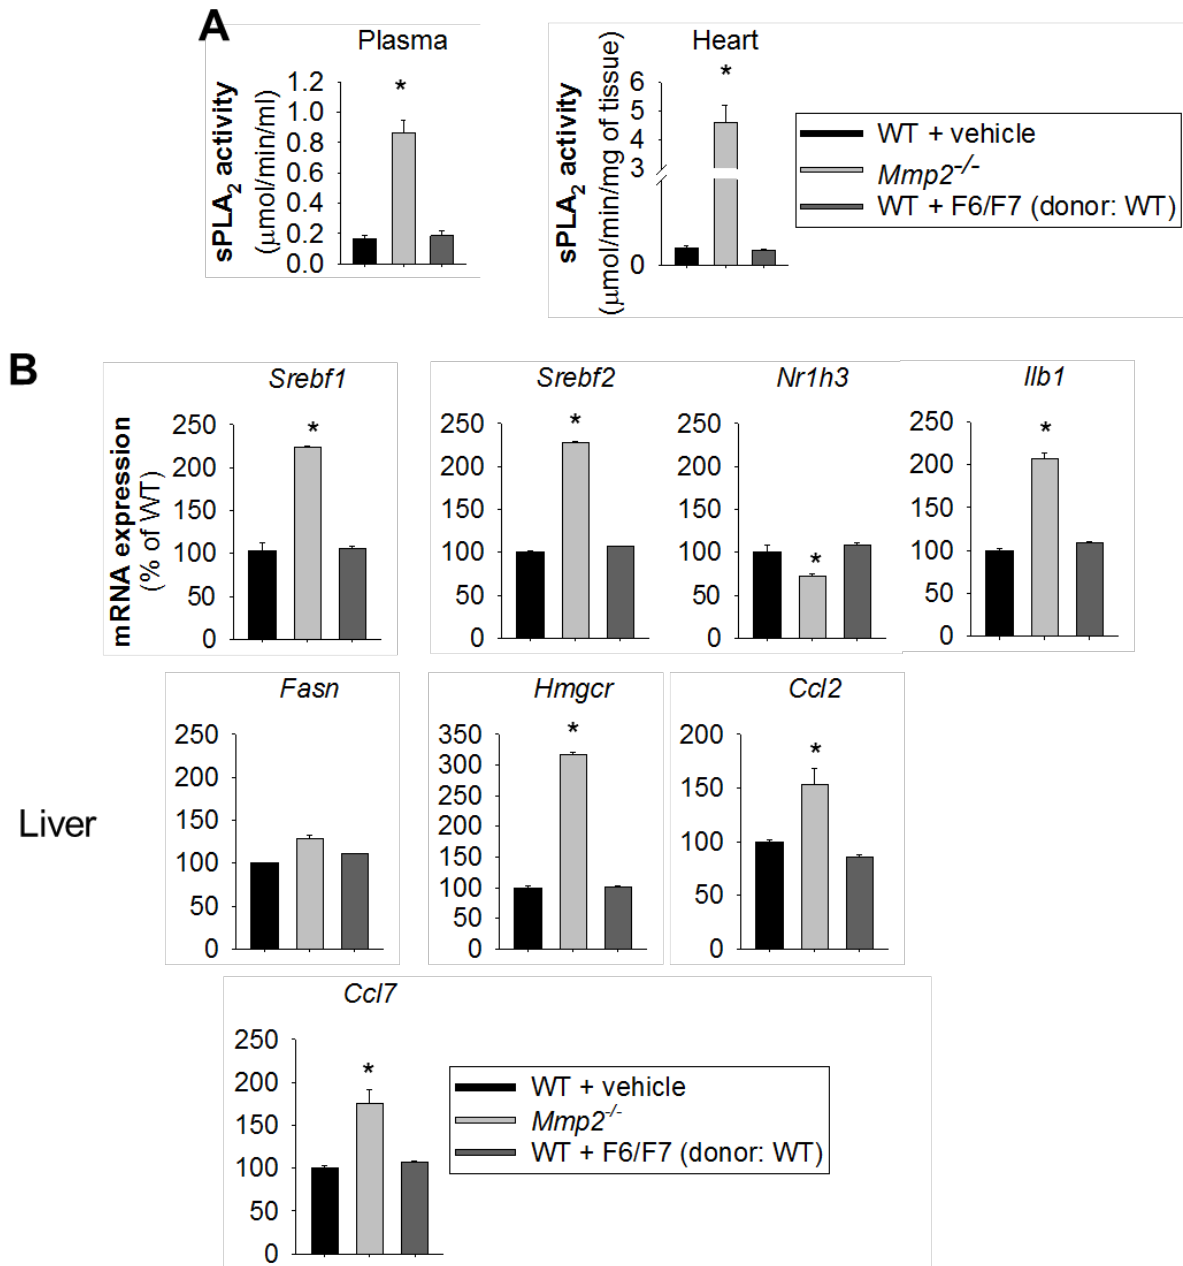

**Supplemental Figure S6.** Phenotype induced by HPLC-fractions F6/F7 from WT donors in recipient WT mice.

(A) Injection of the HPLC-fractions F6/F7 had no impact on plasma or cardiac sPLA<sub>2</sub> of WT recipient mice.

(B) Lack of effect of the HPLC-fractions F6/F7 from WT donors on the hepatic gene expression profile of recipient WT mice.

Activity of plasma and cardiac sPLA<sub>2</sub> and gene expression profiles in recipient WT mice after 5 consecutive injection-days of vehicle (control sterile PBS, 10 mmol/l CaCl<sub>2</sub>) or HPLC-isolated fractions F6/F7 from WT donors. \*:  $P \leq 0.05$  vs. WT + vehicle.  $n=4$  mice per treatment.

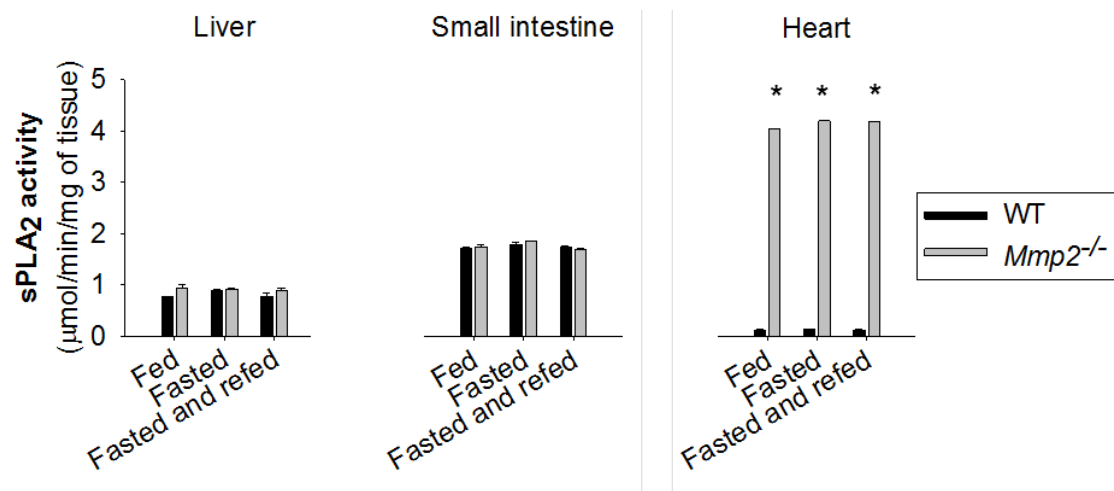

**Supplemental Figure S7. Effect of feeding on cardiac sPLA<sub>2</sub> activity.**

Neither overnight fasting alone nor overnight fasting followed by re-feeding a high carbohydrate diet for 5 hours did alter systemic sPLA<sub>2</sub> activity in WT or *Mmp2*<sup>-/-</sup> mice. Pools of *n*=4 per genotype. \*: *P*<0.05 vs. WT.

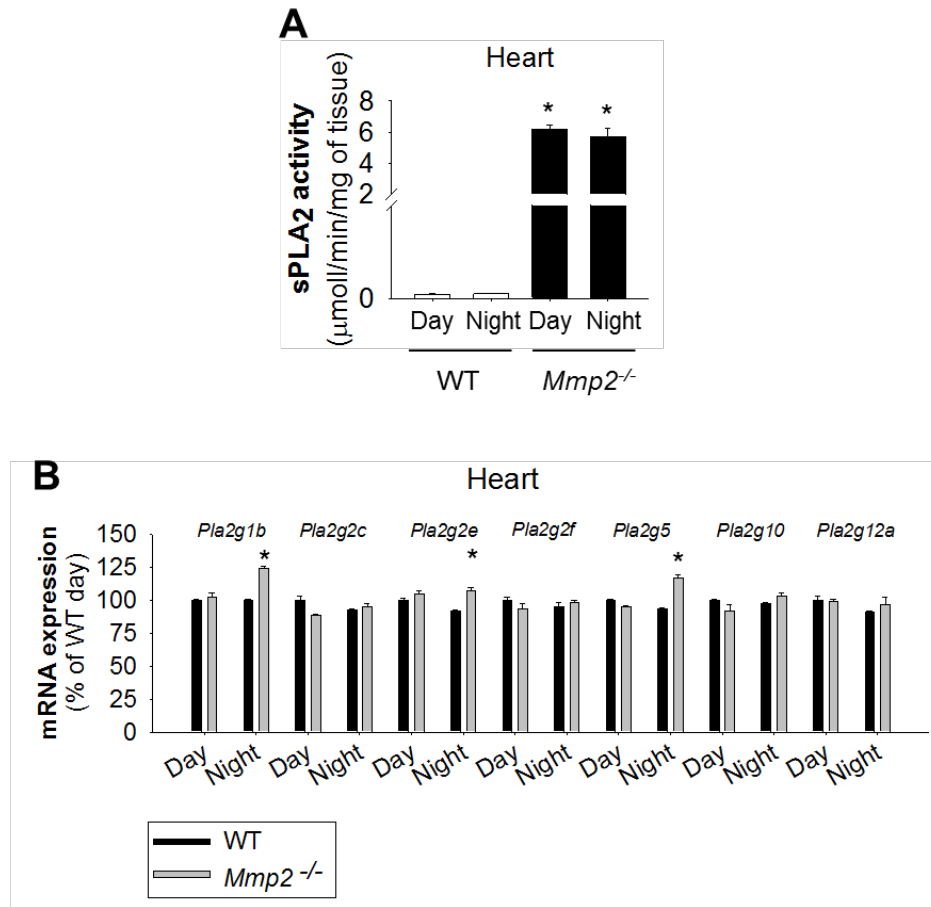

**Supplemental Figure S8. Effect of circadian rhythm on cardiac sPLA<sub>2</sub> activity.**

- (A) Comparison of diurnal and nocturnal sPLA<sub>2</sub> activity for WT and *Mmp2*<sup>-/-</sup> hearts. *n*=4 mice per genotype. \*: *P*≤0.05 vs. WT (Day).
- (B) qRT-PCR analysis for a panel of individual mouse sPLA<sub>2</sub> isoforms at day (11:30 AM ± 0.5 hr) and night (9:30 PM ± 0.5 hr). *n*=3 for WT and *n*=4 for *Mmp2*<sup>-/-</sup>. \*: *P*≤0.05 vs. Day.



## REFERENCE

1. Berry E, Hernandez-Anzaldo S, Ghomashchi F, Lehner R, Murakami M, Gelb MH, Kassiri Z, Wang X, Fernandez-Patron C. Matrix metalloproteinase-2 negatively regulates cardiac secreted phospholipase a2 to modulate inflammation and fever. *J Am Heart Assoc.* 2015;4: e001868 doi: 10.1161/JAHA.115.001868
